# Supplementary material for: Prediction of mortality using a multi-bed vascular calcification score in the Diabetes Heart Study
Source: Springer Nature journal article supplement (doi:10.1186/s12933-014-0160-5), 2014-12-01
Supplement: MOESM1 [file 9760066]

## Additional File 1

Demographic characteristics of European American Diabetes Heart Study (DHS) participants included in the analysis and those excluded from the analysis. Exclusions due to T2D unaffected status n=199 and incomplete covariate information n=313.

|                                        | Mean $\pm$ SD or % |                  |
|----------------------------------------|--------------------|------------------|
|                                        | Included (n=699)   | Excluded (n=521) |
| <b>Demographic Information</b>         |                    |                  |
| Age (years)                            | 62.8 $\pm$ 8.6     | 61.0 $\pm$ 10.2  |
| Gender (% female)                      | 50.2%              | 58.2%            |
| Diabetes duration (years)              | 10.3 $\pm$ 7.1     | 10.6 $\pm$ 7.3   |
| % smoking (current or past)            | 59.9%              | 56.6%            |
| Self-reported history of prior CVD (%) | 43.8%              | 32.6%            |
| Deceased (%)                           | 22.3%              | 25.5%            |
| Deceased from CVD (%)                  | 10.6%              | 11.3%            |
| <b>Body Composition</b>                |                    |                  |
| Height (cm)                            | 168.7 $\pm$ 9.6    | 168.3 $\pm$ 9.7  |
| Weight (kg)                            | 92.0 $\pm$ 19.6    | 88.5 $\pm$ 20.5  |
| BMI (kg/m <sup>2</sup> )               | 32.2 $\pm$ 6.2     | 31.2 $\pm$ 6.7   |
