# Supplementary material for: Prediction of mortality using a multi-bed vascular calcification score in the Diabetes Heart Study
Source: Springer Nature journal article supplement (doi:10.1186/s12933-014-0160-5), 2014-12-01

## Additional File 2

Survival Curves for (A) all-cause and (B) CVD mortality based on increasing coronary artery calcified plaque (CarCP) quintiles.

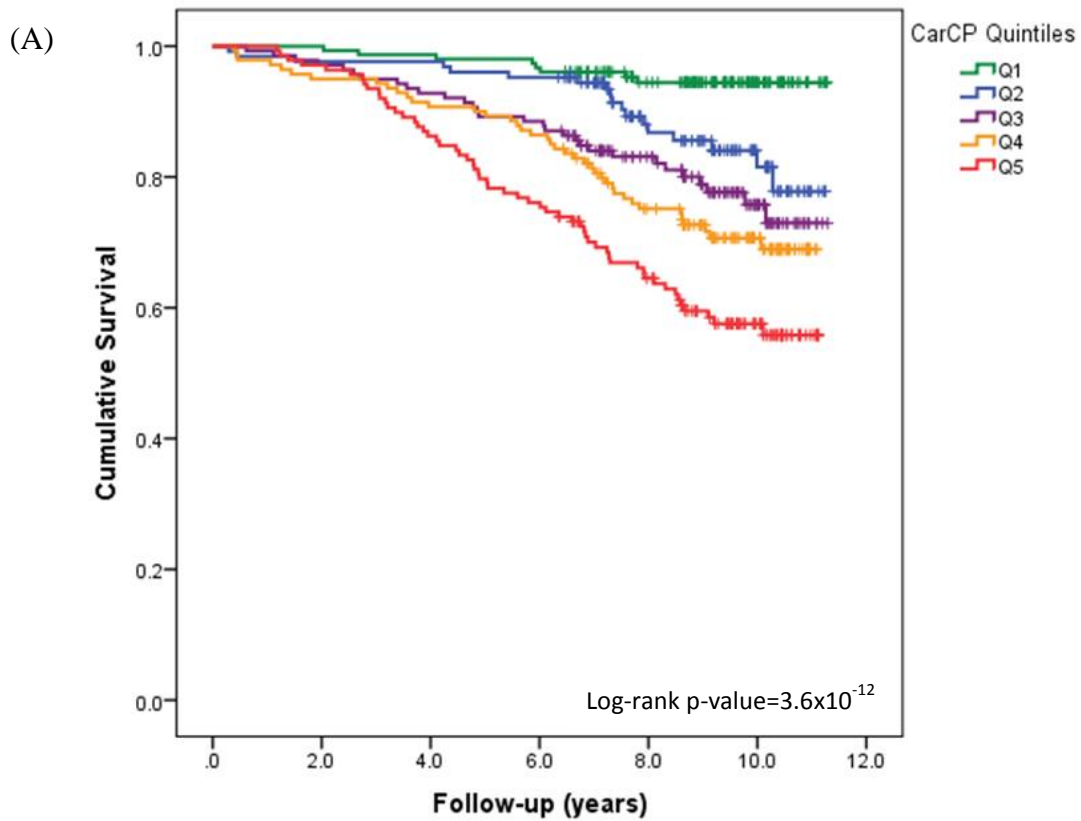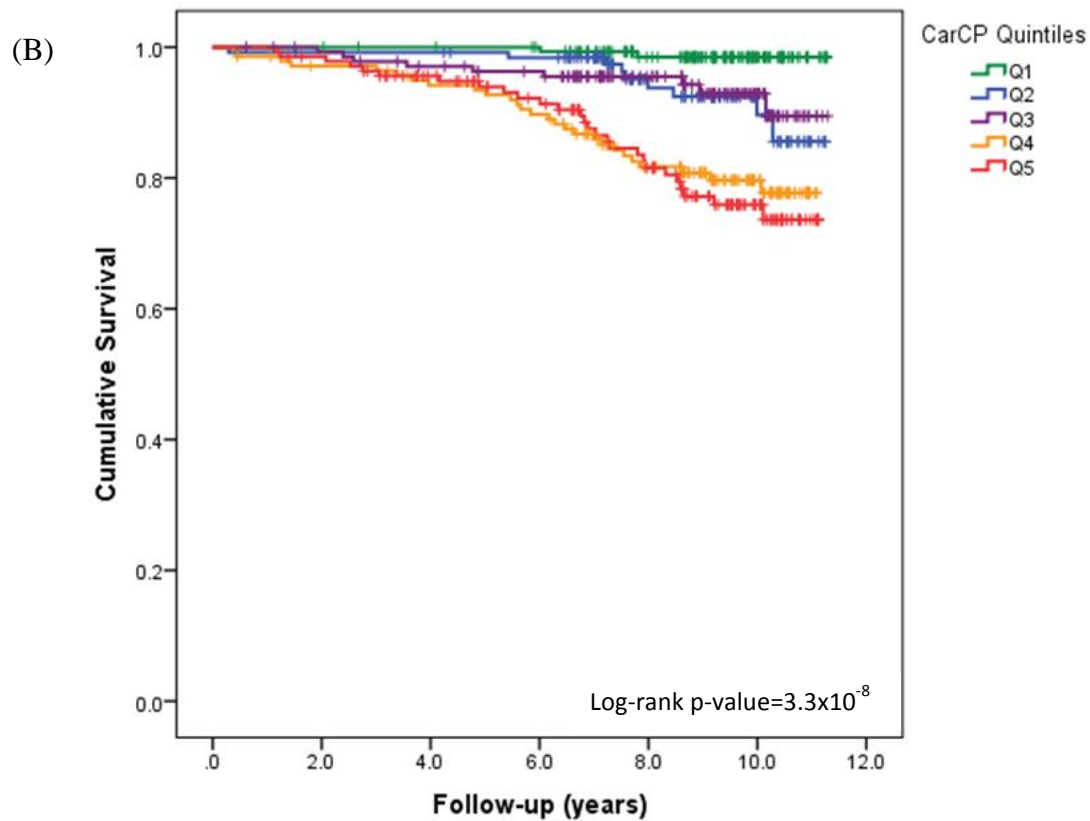

Survival Curves for (A) all-cause and (B) CVD mortality based on increasing abdominal aortic calcified plaque (AACP) quintiles.

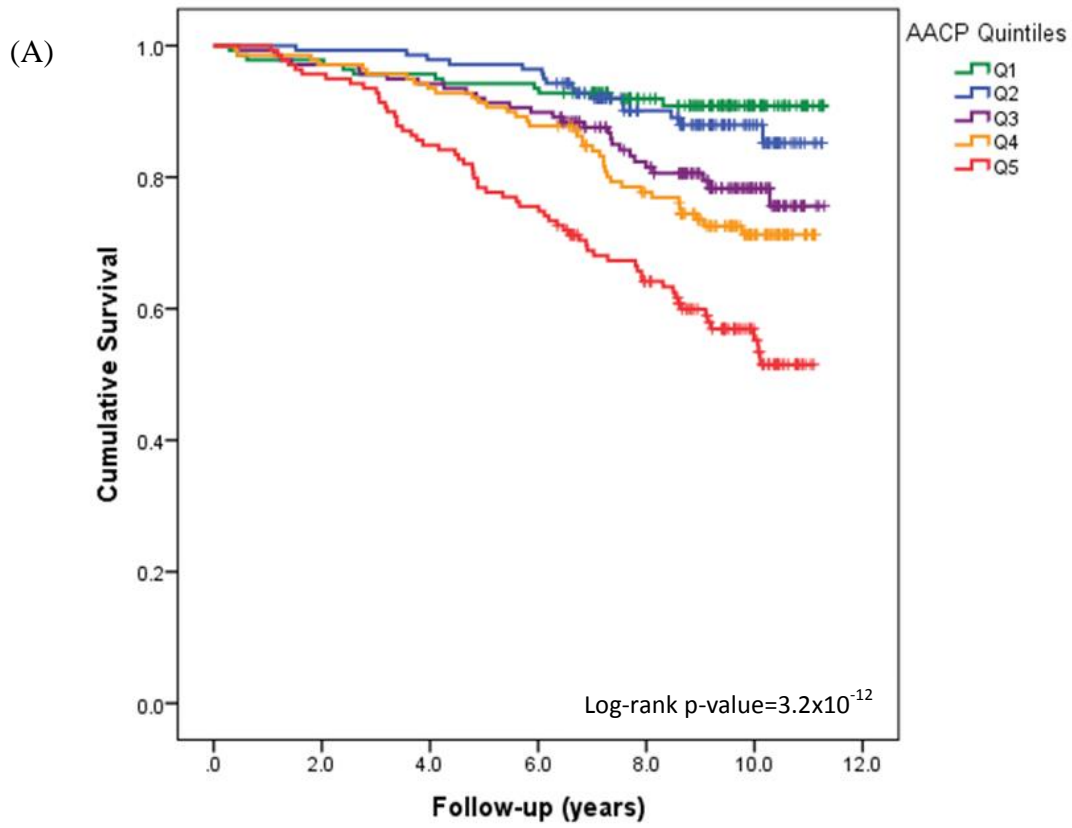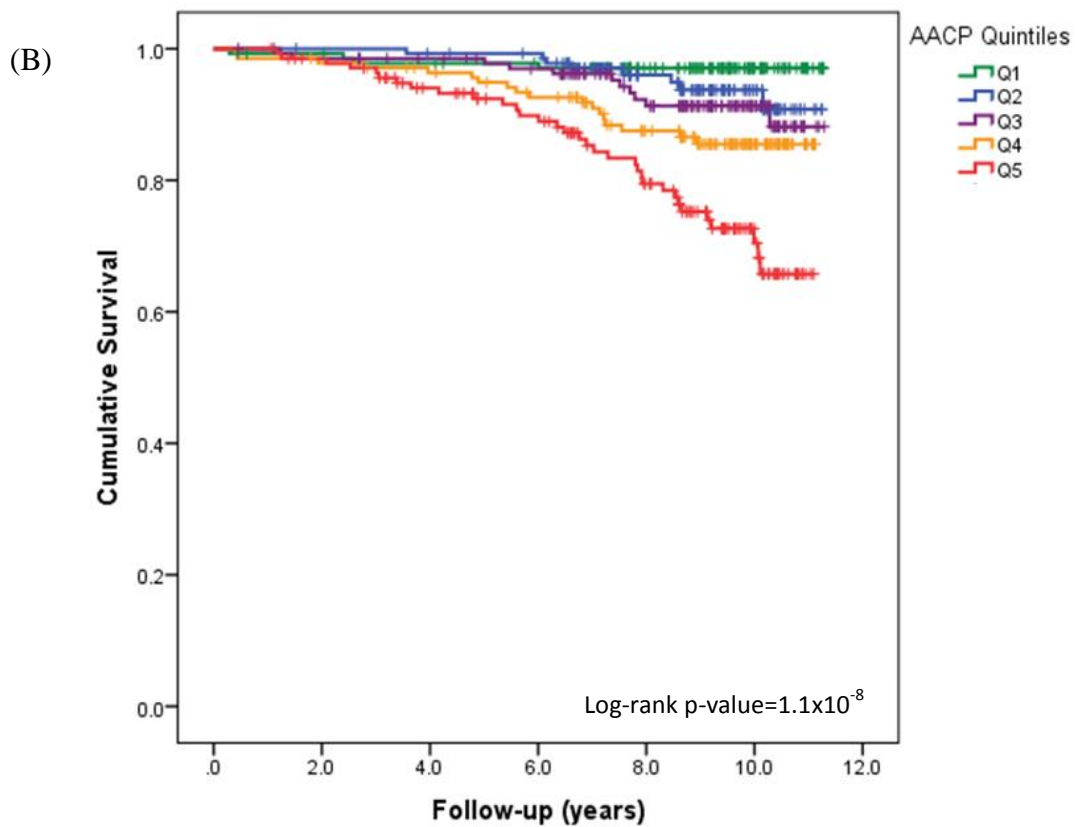

Supplement: MOESM2 [file 9760066]
