# Supplementary material for: Prediction of mortality using a multi-bed vascular calcification score in the Diabetes Heart Study
Source: Springer Nature journal article supplement (doi:10.1186/s12933-014-0160-5), 2014-12-01
Supplement: MOESM3 [file 9760066]

### Additional File 3

Association between vascular calcified plaque scores and **all-cause mortality** in DHS participants based on Cox Proportional Hazards regression **stratified by age** (<65 years, >65 years). Calcified plaque scores are considered as continuous variables and standardized to compare relative effects.

|                                      | Model 1          |                       | Model 2          |                      | Model 3          |                       |
|--------------------------------------|------------------|-----------------------|------------------|----------------------|------------------|-----------------------|
| <b>Less than 65 years (n=421)</b>    |                  |                       |                  |                      |                  |                       |
|                                      | HR (95% CI)      | p-value               | HR (95% CI)      | p-value              | HR (95% CI)      | p-value               |
| <b>CAC</b>                           | 1.57 (1.19-2.09) | 0.002                 | 1.67 (1.20-2.32) | 0.002                | 1.51 (1.09-2.10) | 0.01                  |
| <b>CarCP</b>                         | 1.62 (1.23-2.13) | 0.0006                | 1.64 (1.21-2.22) | 0.001                | 1.52 (1.10-2.10) | 0.01                  |
| <b>AACP</b>                          | 1.53 (1.17-2.01) | 0.002                 | 1.55 (1.17-2.06) | 0.002                | 1.34 (0.99-1.81) | 0.06                  |
| <b>Multi-bed</b>                     | 1.57 (1.20-2.04) | 0.0009                | 1.63 (1.21-2.19) | 0.001                | 1.46 (1.06-2.01) | 0.02                  |
| <b>Greater than 65 years (n=278)</b> |                  |                       |                  |                      |                  |                       |
| <b>CAC</b>                           | 2.10 (1.53-2.87) | 3.9x10 <sup>-6</sup>  | 2.13 (1.45-3.14) | 0.0001               | 2.01 (1.34-3.00) | 0.0007                |
| <b>CarCP</b>                         | 1.77 (1.40-2.24) | 2.3x10 <sup>-6</sup>  | 1.64 (1.29-2.09) | 5.8x10 <sup>-5</sup> | 1.60 (1.24-2.06) | 0.0003                |
| <b>AACP</b>                          | 1.52 (1.29-1.80) | 9.6x10 <sup>-7</sup>  | 1.38 (1.16-1.66) | 0.0004               | 1.38 (1.14-1.67) | 0.0009                |
| <b>Multi-bed</b>                     | 1.65 (1.38-1.97) | 2.57x10 <sup>-8</sup> | 1.58 (1.30-1.91) | 3.0x10 <sup>-6</sup> | 1.54 (1.25-1.89) | 4.37x10 <sup>-5</sup> |

Model 1: unadjusted; Model 2: adjusted for age and sex; Model 3: adjusted for age, sex, total cholesterol, HDL-cholesterol, smoking, systolic blood pressure, and anti-hypertensive medication use. CAC: coronary artery calcified plaque; CarCP: carotid artery calcified plaque; AACP – abdominal aortic calcified plaque.

Association between vascular calcified plaque scores and **CVD mortality** in DHS participants based on Cox Proportional Hazards regression **stratified by age** (<65 years, >65 years). Calcified plaque scores are considered as continuous variables and standardized to compare relative effects.

|                                      | <b>Model 1</b>     |                      | <b>Model 2</b>     |                | <b>Model 3</b>     |                |
|--------------------------------------|--------------------|----------------------|--------------------|----------------|--------------------|----------------|
| <b>Less than 65 years (n=421)</b>    |                    |                      |                    |                |                    |                |
|                                      | <b>HR (95% CI)</b> | <b>p-value</b>       | <b>HR (95% CI)</b> | <b>p-value</b> | <b>HR (95% CI)</b> | <b>p-value</b> |
| <b>CAC</b>                           | 1.95 (1.12-3.43)   | 0.02                 | 2.19 (1.19-4.02)   | 0.01           | 2.02 (1.13-3.61)   | 0.02           |
| <b>CarCP</b>                         | 1.78 (1.16-2.75)   | 0.009                | 1.90 (1.19-3.01)   | 0.007          | 1.82 (1.14-2.90)   | 0.01           |
| <b>AACP</b>                          | 2.06 (1.36-3.12)   | 0.0007               | 2.25 (1.44-3.51)   | 0.0004         | 2.16 (1.40-3.34)   | 0.0005         |
| <b>Multi-bed</b>                     | 1.91 (1.27-2.89)   | 0.002                | 2.13 (1.36-3.34)   | 0.001          | 2.08 (1.33-3.23)   | 0.001          |
| <b>Greater than 65 years (n=278)</b> |                    |                      |                    |                |                    |                |
| <b>CAC</b>                           | 1.93 (1.32-2.81)   | 0.0007               | 1.92 (1.22-3.01)   | 0.005          | 1.79 (1.12-2.86)   | 0.02           |
| <b>CarCP</b>                         | 1.86 (1.30-2.64)   | 0.0006               | 1.72 (1.19-2.50)   | 0.004          | 1.74 (1.17-2.60)   | 0.007          |
| <b>AACP</b>                          | 1.48 (1.16-1.87)   | 0.001                | 1.33 (1.03-1.71)   | 0.03           | 1.32 (1.00-1.72)   | 0.05           |
| <b>Multi-bed</b>                     | 1.63 (1.28-2.08)   | 6.4x10 <sup>-5</sup> | 1.55 (1.19-2.02)   | 0.001          | 1.54 (1.16-2.05)   | 0.003          |

Model 1: unadjusted; Model 2: adjusted for age and sex; Model 3: adjusted for age, sex, total cholesterol, HDL-cholesterol, smoking, systolic blood pressure, and anti-hypertensive medication use. CAC: coronary artery calcified plaque; CarCP: carotid artery calcified plaque; AACP – abdominal aortic calcified plaque.

Association between vascular calcified plaque scores and **all-cause mortality** in DHS participants based on Cox Proportional Hazards regression **stratified by history of prior CVD**. Calcified plaque scores are considered as continuous variables and standardized to compare relative effects.

|                                     | <b>Model 1</b>     |                       | <b>Model 2</b>     |                      | <b>Model 3</b>     |                      |
|-------------------------------------|--------------------|-----------------------|--------------------|----------------------|--------------------|----------------------|
| <b>No prior CVD (n=385)</b>         |                    |                       |                    |                      |                    |                      |
|                                     | <b>HR (95% CI)</b> | <b>p-value</b>        | <b>HR (95% CI)</b> | <b>p-value</b>       | <b>HR (95% CI)</b> | <b>p-value</b>       |
| <b>CAC</b>                          | 2.26 (1.61-3.18)   | 2.73x10 <sup>-6</sup> | 2.24 (1.46-3.45)   | 0.0002               | 2.11 (1.40-3.18)   | 0.0004               |
| <b>CarCP</b>                        | 2.11 (1.58-2.81)   | 3.7x10 <sup>-7</sup>  | 1.86 (1.36-2.55)   | 0.0001               | 1.75 (1.26-2.43)   | 0.0009               |
| <b>AACP</b>                         | 1.99 (1.54-2.58)   | 1.5x10 <sup>-7</sup>  | 1.72 (1.29-2.28)   | 0.0002               | 1.61 (1.21-2.14)   | 0.001                |
| <b>Multi-bed</b>                    | 2.02 (1.62-2.52)   | 5.3x10 <sup>-10</sup> | 1.87 (1.43-2.44)   | 4.3x10 <sup>-6</sup> | 1.78 (1.34-2.36)   | 6.5x10 <sup>-5</sup> |
| <b>History of prior CVD (n=314)</b> |                    |                       |                    |                      |                    |                      |
| <b>CAC</b>                          | 1.52 (1.13-2.04)   | 0.006                 | 1.42 (1.04-1.92)   | 0.03                 | 1.37 (0.98-1.93)   | 0.07                 |
| <b>CarCP</b>                        | 1.59 (1.24-2.04)   | 0.0003                | 1.35 (1.08-1.70)   | 0.009                | 1.33 (1.05-1.68)   | 0.02                 |
| <b>AACP</b>                         | 1.45 (1.23-1.71)   | 1.3x10 <sup>-5</sup>  | 1.25 (1.06-1.49)   | 0.01                 | 1.22 (1.02-1.47)   | 0.03                 |
| <b>Multi-bed</b>                    | 1.52 (1.25-1.85)   | 2.8x10 <sup>-5</sup>  | 1.34 (1.10-1.63)   | 0.004                | 1.31 (1.07-1.62)   | 0.01                 |

Model 1: unadjusted; Model 2: adjusted for age and sex; Model 3: adjusted for age, sex, total cholesterol, HDL-cholesterol, smoking, systolic blood pressure, and anti-hypertensive medication use. CAC: coronary artery calcified plaque; CarCP: carotid artery calcified plaque; AACP – abdominal aortic calcified plaque.

Association between vascular calcified plaque scores and **CVD mortality** in DHS participants based on Cox Proportional Hazards regression **stratified by history of prior CVD**. Calcified plaque scores are considered as continuous variables and standardized to compare relative effects.

|                                     | Model 1          |                      | Model 2          |         | Model 3          |         |
|-------------------------------------|------------------|----------------------|------------------|---------|------------------|---------|
| <b>No prior CVD (n=385)</b>         |                  |                      |                  |         |                  |         |
|                                     | HR (95% CI)      | p-value              | HR (95% CI)      | p-value | HR (95% CI)      | p-value |
| <b>CAC</b>                          | 2.25 (1.22-4.13) | 0.009                | 1.88 (0.81-4.34) | 0.14    | 1.85 (0.81-4.23) | 0.14    |
| <b>CarCP</b>                        | 2.82 (1.62-4.93) | 0.0003               | 2.34 (1.31-4.17) | 0.004   | 2.50 (1.30-4.80) | 0.006   |
| <b>AACP</b>                         | 2.62 (1.61-4.27) | 0.0001               | 2.11 (1.18-3.77) | 0.01    | 2.28 (1.24-4.19) | 0.008   |
| <b>Multi-bed</b>                    | 2.36 (1.64-3.38) | 3.2x10 <sup>-6</sup> | 2.05 (1.30-3.25) | 0.002   | 2.28 (1.38-3.75) | 0.001   |
| <b>History of prior CVD (n=314)</b> |                  |                      |                  |         |                  |         |
| <b>CAC</b>                          | 1.63 (1.10-2.42) | 0.02                 | 1.58 (1.09-2.30) | 0.02    | 1.48 (0.99-2.22) | 0.06    |
| <b>CarCP</b>                        | 1.64 (1.17-2.31) | 0.005                | 1.38 (1.00-1.92) | 0.05    | 1.33 (0.95-1.85) | 0.09    |
| <b>AACP</b>                         | 1.47 (1.18-1.84) | 0.0007               | 1.26 (0.99-1.60) | 0.07    | 1.20 (0.93-1.54) | 0.16    |
| <b>Multi-bed</b>                    | 1.58 (1.20-2.06) | 0.001                | 1.39 (1.05-1.83) | 0.02    | 1.33 (1.00-1.76) | 0.05    |

Model 1: unadjusted; Model 2: adjusted for age and sex; Model 3: adjusted for age, sex, total cholesterol, HDL-cholesterol, smoking, systolic blood pressure, and anti-hypertensive medication use. CAC: coronary artery calcified plaque; CarCP: carotid artery calcified plaque; AACP – abdominal aortic calcified plaque.
