# Supplementary material for: Prediction of mortality using a multi-bed vascular calcification score in the Diabetes Heart Study
Source: Springer Nature journal article supplement (doi:10.1186/s12933-014-0160-5), 2014-12-01
Supplement: MOESM4 [file 9760066]

#### Additional File 4

Changes in risk classification for all-cause mortality and CVD-mortality as assessed using a net reclassification index (NRI) comparing Framingham risk factors and Framingham risk factors with the addition of each of the vascular calcification scores.

| <b>Trait</b>                                                  | <b>% reclassified</b> | <b>NRI</b> | <b>p-value</b> |
|---------------------------------------------------------------|-----------------------|------------|----------------|
| <b>Coronary artery calcified plaque</b>                       |                       |            |                |
| All-cause Mortality                                           | 29.3%                 | 0.122      | 0.009          |
| CVD Mortality                                                 | 27.5%                 | 0.145      | 0.005          |
| <b>Carotid artery calcified plaque</b>                        |                       |            |                |
| All-cause Mortality                                           | 30.0%                 | 0.119      | 0.013          |
| CVD Mortality                                                 | 30.8%                 | 0.117      | 0.047          |
| <b>Abdominal Aortic calcified plaque</b>                      |                       |            |                |
| All-cause Mortality                                           | 24.3%                 | 0.100      | 0.024          |
| CVD Mortality                                                 | 27.3%                 | 0.149      | 0.008          |
| <b>Multi-bed score</b>                                        |                       |            |                |
| All-cause Mortality                                           | 29.0%                 | 0.149      | 0.002          |
| CVD Mortality                                                 | 28.9%                 | 0.149      | 0.011          |
| <b>Coronary + Carotid + Abdominal Aortic Calcified Plaque</b> |                       |            |                |
| All-cause Mortality                                           | 31.9%                 | 0.109      | 0.027          |
| CVD Mortality                                                 | 32.0%                 | 0.169      | 0.004          |
