# Supplementary material for: Prediction of mortality using a multi-bed vascular calcification score in the Diabetes Heart Study
Source: Springer Nature journal article supplement (doi:10.1186/s12933-014-0160-5), 2014-12-01
Supplement: MOESM5 [file 9760066]

## Additional File 5

Association between vascular calcified plaque score quintiles and mortality in DHS participants using models adjusted for age, sex, total cholesterol, HDL-cholesterol, smoking, systolic blood pressure, and use of anti-hypertensive medications. CAC: coronary artery calcified plaque; CarCP: carotid artery calcified plaque; AACP: abdominal aortic calcified plaque.

| Quintiles                  | CAC            |                   |         | CarCP          |                   |                       | AACP           |                   |         | Multi-bed      |                   |                       |
|----------------------------|----------------|-------------------|---------|----------------|-------------------|-----------------------|----------------|-------------------|---------|----------------|-------------------|-----------------------|
|                            | Quintile Range | HR (95% CI)       | p-value | Quintile Range | HR (95% CI)       | p-value               | Quintile Range | HR (95% CI)       | p-value | Quintile Range | HR (95% CI)       | p-value               |
| <b>All-cause mortality</b> |                |                   |         |                |                   |                       |                |                   |         |                |                   |                       |
| <b>Qu1</b>                 | 0-29.5         | Ref               | -       | 0              | Ref               | -                     | 0-497          | Ref               | -       | 0-0.10         | Ref               | -                     |
| <b>Qu2</b>                 | 29.5-214       | 1.80 (0.84-3.84)  | 0.13    | 0-20           | 2.09 (0.93-4.67)  | 0.07                  | 497-2713       | 0.83 (0.38-1.81)  | 0.64    | 0.1-0.45       | 2.07 (0.96-4.46)  | 0.06                  |
| <b>Qu3</b>                 | 214-824        | 1.73 (0.81-3.71)  | 0.16    | 20-123         | 2.71 (1.35-5.45)  | 0.005                 | 2713-8539      | 1.38 (0.71-2.66)  | 0.34    | 0.45-1.39      | 1.48 (0.73-2.99)  | 0.28                  |
| <b>Qu4</b>                 | 824-3259       | 2.30 (1.11-4.74)  | 0.02    | 123-480        | 3.19 (1.58-6.46)  | 0.0012                | 8539-21858     | 1.48 (0.76-2.89)  | 0.25    | 1.39-3.33      | 2.85 (1.36-5.98)  | 0.006                 |
| <b>Qu5</b>                 | 3295-50415     | 4.25 (1.94-9.31)  | 0.0003  | 480-5954       | 4.50 (2.22-9.10)  | 2.96x10 <sup>-5</sup> | 21858-94156    | 2.34 (1.22-4.49)  | 0.01    | 3.33-23.57     | 4.59 (2.18-9.69)  | 6.24x10 <sup>-5</sup> |
| <b>CVD-Mortality</b>       |                |                   |         |                |                   |                       |                |                   |         |                |                   |                       |
| <b>Qu1</b>                 | 0-29.5         | Ref               | -       | 0              | Ref               | -                     | 0-496.6        | Ref               | -       | 0-0.10         | Ref               | -                     |
| <b>Qu2</b>                 | 29.5-214       | 2.28 (0.66-7.94)  | 0.19    | 0-20           | 4.32 (0.89-20.96) | 0.07                  | 497-2713       | 1.28 (0.31-5.30)  | 0.73    | 0.1-0.45       | 3.24 (0.77-13.66) | 0.11                  |
| <b>Qu3</b>                 | 214-824        | 1.50 (0.44-5.10)  | 0.51    | 20-123         | 3.25 (0.75-14.19) | 0.17                  | 2713-8539      | 1.61 (0.42-0.61)  | 0.49    | 0.45-1.39      | 2.47 (0.53-11.55) | 0.25                  |
| <b>Qu4</b>                 | 824-3259       | 3.48 (1.14-10.64) | 0.03    | 123-480        | 8.42 (1.97-35.87) | 0.004                 | 8539-21858     | 2.29 (0.61-8.52)  | 0.22    | 1.39-3.33      | 6.22 (1.45-26.68) | 0.01                  |
| <b>Qu5</b>                 | 3295-50415     | 4.64 (1.38-15.65) | 0.01    | 480-5954       | 7.98 (1.89-33.66) | 0.005                 | 21858-94156    | 3.79 (1.05-13.69) | 0.04    | 3.33-23.57     | 9.67 (2.23-41.97) | 0.002                 |
